# Supplementary material
Source: publisher figshare collection journal article supplement (https://aacr.figshare.com/articles/dataset/_/22651608)
Supplement: Supplementary file 1 [file 40209267]

Supplement Figure 3.

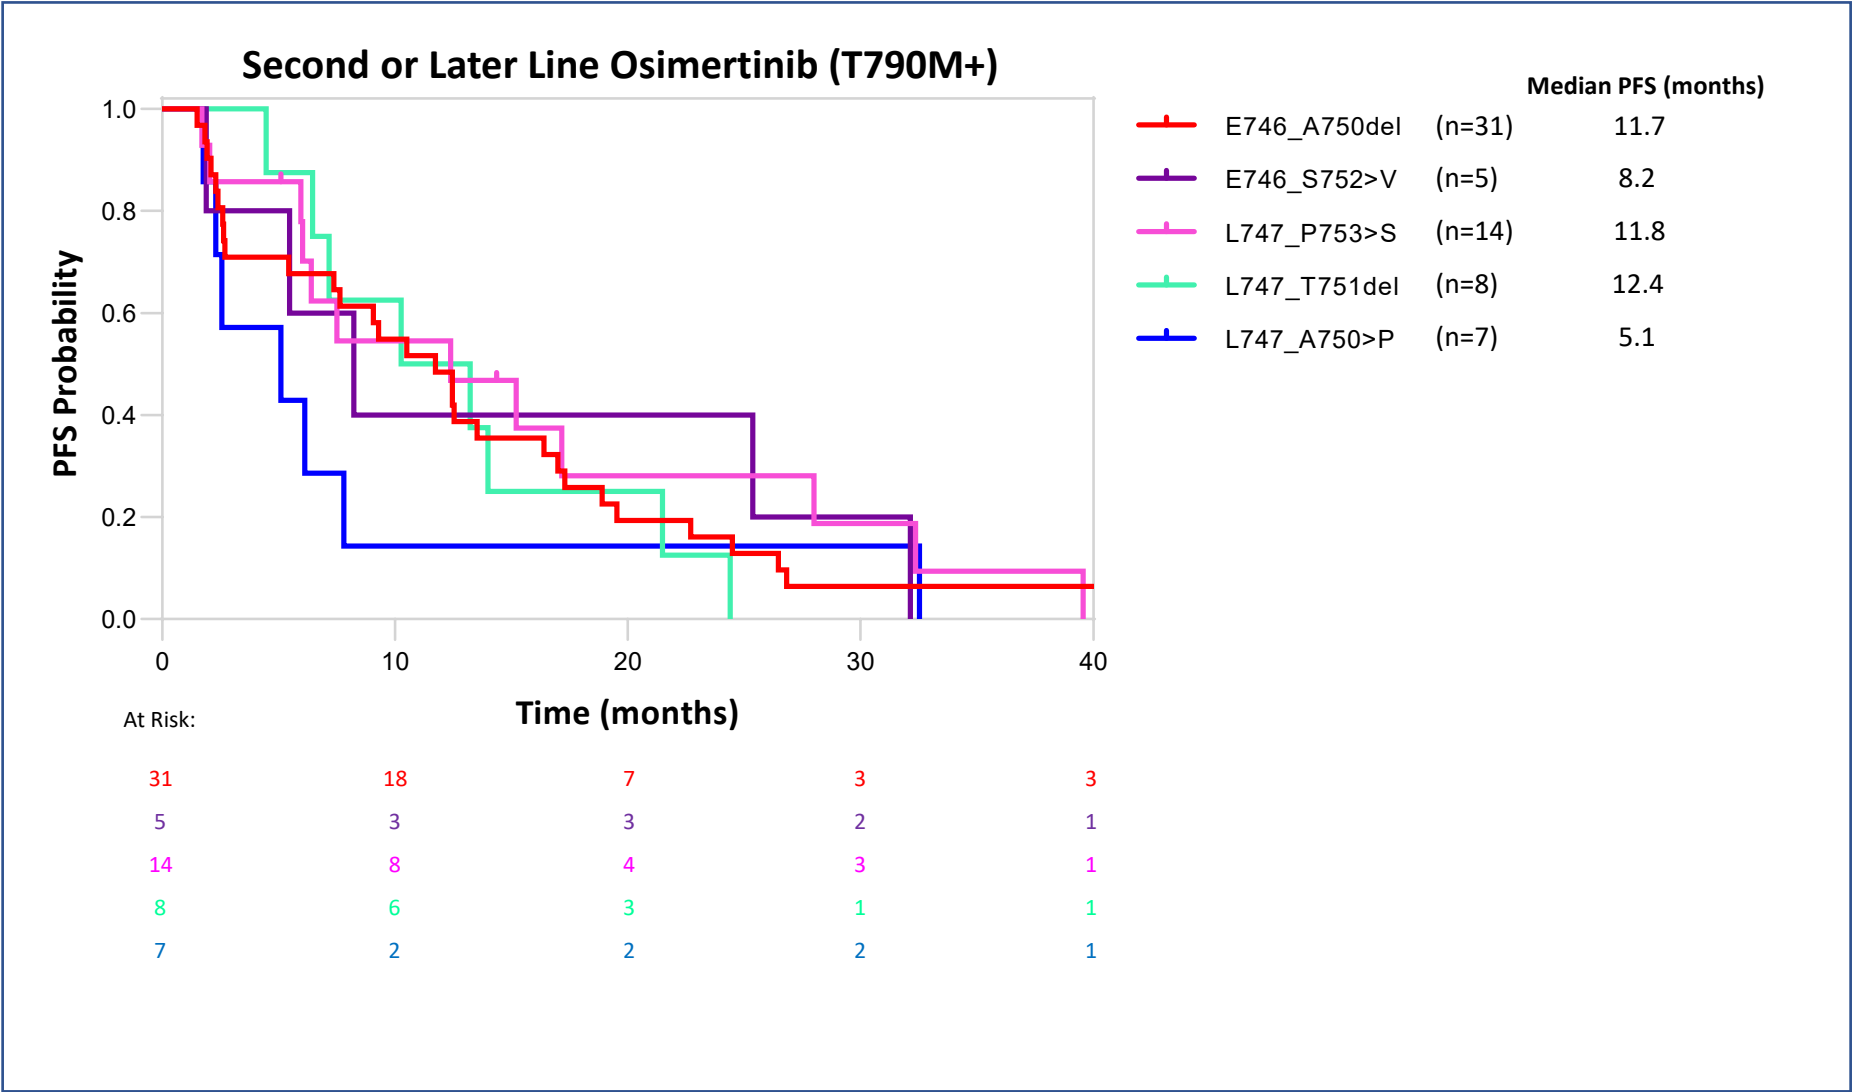

Supplementary Figure 3. Progression Free Survival for patients with tumors harboring select exon 19 deletions treated with second or later line osimertinib (T790M+). The point estimate for median progression free survival associated with each mutation is listed to the right of the figure legend.
